# Supplementary material for: A theoretical exploration of the second-order NLO properties of linked sandwich double-layered metallacarboranes: charge transfer mediated by linker groups
Source: Royal Society of Chemistry journal article supplement (doi:10.1039/d3cp02114a), 2023-01-01
Supplement: d3cp02114a1.pdf [file d3cp02114a1.pdf]

## Supplementary Information

### **A Theoretical exploration on second-order NLO properties of linked sandwich double-layered metallocarborane: magic charge transfer caused by linked groups**

Nana Ma,\* Yajing Bian, Weiyi Cheng, Yameng Li, Qiongjin Wang and Shujun Li\*

*School of Chemistry and Chemical Engineering, Collaborative Innovation Center of Henan Province for Green Manufacturing of Fine Chemicals, Key Laboratory of Green Chemical Media and Reactions, Ministry of Education, Henan Key laboratory of Organic Functional Molecule and Drug Innovation, Henan Key Laboratory of Boron Chemistry and Advanced Energy Materials, Henan Normal University, Xinxiang, Henan, 453007, China.*

### **Content**

**Table S1.**  $\beta$  values (a.u.) calculated by CAM-B3LYP and  $\omega$ B97XD functionals with 6-31+G(d)/SDD basis set for redox states.

**Fig. S1.** Spin density of oxidation states for all the studied systems.

**Fig. S2.** Spin density of reduced states for all the studied systems.

**Table S1.**  $\beta$  values (a.u.) calculated by CAM-B3LYP and  $\omega$ B97XD functionals with 6-31+G(d)/SDD basis set for redox states.

| Comp.     | CAM-B3LYP/6-31+G(d)/SDD |      |       | $\omega$ B97XD6-31+G(d)/SDD |      |       |
|-----------|-------------------------|------|-------|-----------------------------|------|-------|
|           | oxi                     | 0    | red   | oxi                         | 0    | red   |
| <b>1a</b> | 40.4                    | 4.6  | 19.1  | 39.5                        | 4.5  | 16.6  |
| <b>1b</b> | 8.8                     | 7.0  | 11.7  | 7.6                         | 7.0  | 10.7  |
| <b>1c</b> | 29.1                    | 7.6  | 70.4  | 31.9                        | 7.5  | 72.1  |
| <b>1d</b> | 69.8                    | 5.7  | 47.3  | 54.8                        | 5.6  | 40.1  |
| <b>2a</b> | 10.1                    | 4.5  | 4.0   | 9.3                         | 4.6  | 3.9   |
| <b>2b</b> | 5.2                     | 2.5  | 5.6   | 4.7                         | 2.6  | 1.9   |
| <b>2c</b> | 55.3                    | 5.0  | 2.7   | 67.1                        | 4.7  | 13.6  |
| <b>2d</b> | 19.4                    | 6.0  | 13.2  | 46.8                        | 5.8  | 18.1  |
| <b>3a</b> | 48.6                    | 9.3  | 29.0  | 12.7                        | 8.9  | 25.1  |
| <b>3b</b> | 16.3                    | 5.5  | 63.7  | 19.0                        | 5.9  | 59.2  |
| <b>3c</b> | 98.9                    | 10.5 | 397.7 | 90.3                        | 10.5 | 382.3 |
| <b>3d</b> | 171.0                   | 2.0  | 93.0  | 146.5                       | 2.2  | 77.7  |
| <b>4a</b> | 57.7                    | 8.0  | 46.9  | 42.3                        | 7.6  | 39.5  |
| <b>4b</b> | 72.0                    | 4.6  | 102.7 | 62.4                        | 4.9  | 94.3  |
| <b>4c</b> | 97.9                    | 6.3  | 444.9 | 83.1                        | 6.3  | 530.8 |
| <b>4d</b> | 317.5                   | 2.7  | 109.4 | 235.5                       | 3.0  | 108.3 |

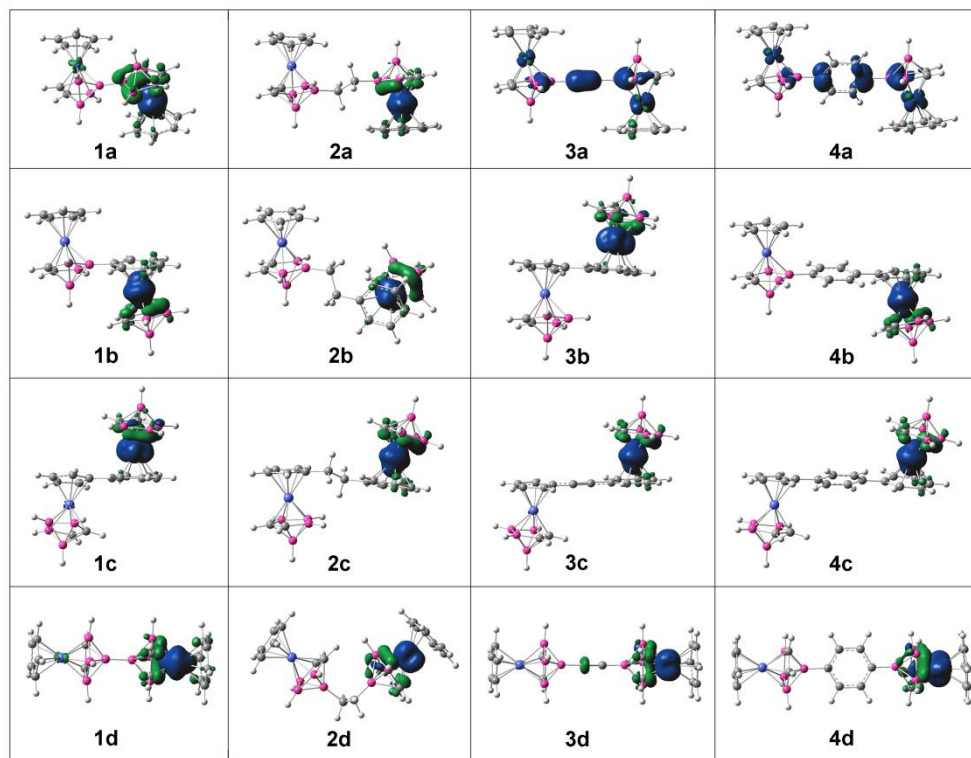

**Fig. S1.** Spin density of oxidation states for all the studied systems.

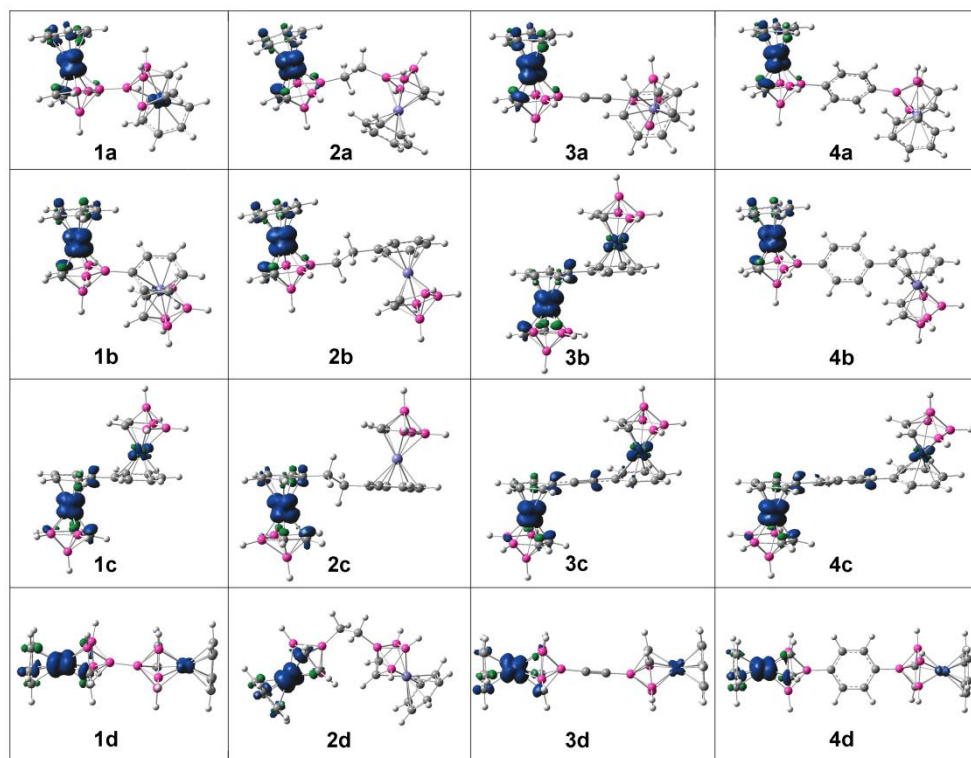

**Fig. S2.** Spin density of reduced states for all the studied systems.
